# Supplementary material for: Neurotropic Grades in Lattice Corneal Dystrophy Based on in Vivo Confocal Microscopy Observation
Source: Research Square preprint supplement (doi:10.21203/rs.3.rs-114232/v1), 2020-12-01
Supplement: Supplementary file 1 [file d9cfc260ce323edd0e170e70.docx]

Table2. Data of the neurotropic phenomenonof LCD from the remaining 12 patients, 9 with a 6-year of observation and 2 (3 eyes) with a 4-year observation
